# Supplementary material for: Efficacy of Thiamine in the Treatment of Postcardiac Arrest Patients: A Randomized Controlled Study
Source: Hindawi journal article supplement (doi:10.1155/2020/2981079), 2020-06-08
Supplement: f1 [file 2981079.f1.pdf]

## **Supplementary Appendix**

### **Independent data monitoring and committee**

The independent data monitoring and committee is under the Office of Human Research Ethics Committee (HREC), Faculty of Medicine, Prince of Songkla University. The primary role is to protect patient safety. The investigators must report all adverse events that are possibly related to the study and all patients that died during the study.

### **Discontinued criteria**

1. Patients or representative withdrawing.
2. Presence of side effects of thiamine administration.

### **Inclusion and exclusion criteria**

#### **Inclusion criteria**

1. Patients aged 18 years or older.
2. Successfully resuscitated from out-of-hospital cardiac arrest (OHCA) and sustained return of spontaneous circulation (ROSC) (more than 20 consecutive min and signs of circulation persist).
3. Patients who were comatose (Glasgow coma score of 8 or less).
4. Patients were admitted to the medical intensive care unit (ICU).

#### **Exclusion criteria**

1. Known limitation in therapy or Do Not Resuscitate order.
2. Pregnancy.
3. Suspected or confirmed intracranial pathology (ischemic stroke or intracerebral hemorrhage).
4. Poor neurological performance status (pre-arrest cerebral performance category [CPC] 3 or 4).
5. Prior cardiac arrest.
6. Contraindications to thiamine.

## Supplementary tables

**Table S1** Baseline characteristics of out-of-hospital cardiac arrest (OHCA) patients randomized to receive thiamine or placebo.

| <b>Characteristic</b>                     | <b>Thiamine<br/>(n = 20)</b> | <b>Placebo<br/>(n = 17)</b> |
|-------------------------------------------|------------------------------|-----------------------------|
| The first person contacted by a bystander |                              |                             |
| Relative                                  | 6 (30)                       | 7 (41.2)                    |
| EMS                                       | 11 (55)                      | 7 (41.2)                    |
| Hospital                                  | 2 (10)                       | 1 (5.8)                     |
| No call                                   | 1 (5)                        | 2 (11.8)                    |
| First monitored cardiac rhythm            |                              |                             |
| Asystole                                  | 3 (15)                       | 2 (11.8)                    |
| PEA                                       | 6 (30)                       | 7 (41.2)                    |
| VF                                        | 10 (50)                      | 8 (47.1)                    |
| VT                                        | 1 (5)                        | 0                           |
| Defibrillated by EMS                      | 4 (20)                       | 5 (29.4)                    |
| AED use by bystander or EMS               | 5 (25)                       | 5 (29.4)                    |
| EMS response time, median (IQR), min      | 20 (8–30)                    | 10 (5–22.5)                 |
| Mode of transportation                    |                              |                             |
| Own transport                             | 8 (40)                       | 7 (41.2)                    |
| EMS                                       | 8 (40)                       | 10 (58.8)                   |
| Public transport                          | 4 (20)                       | 0                           |
| Cause of cardiac arrest                   |                              |                             |
| Cardiac causes                            | 14 (70)                      | 12 (70.6)                   |

| <b>Characteristic</b>                | <b>Thiamine<br/>(n = 20)</b> | <b>Placebo<br/>(n = 17)</b> |
|--------------------------------------|------------------------------|-----------------------------|
| STEMI                                | 11 (78)                      | 3 (25)                      |
| Respiratory failure                  | 5 (25)                       | 4 (23.5)                    |
| Metabolic causes                     | 1 (5)                        | 0                           |
| Unidentified causes                  | 0                            | 1 (5.9)                     |
| Hospital stay, median (IQR),<br>days | 15 (8–33)                    | 11 (3.5–29.5)               |

**Notes:** Data are presented as numbers (%) unless otherwise specified.

**Abbreviations:** AED, automated external defibrillator; EMS, emergency medical service; IQR, interquartile range; PEA, pulseless electrical activity; STEMI, ST-segment elevation myocardial infarction; VF, ventricular fibrillation; VT, ventricular tachycardia

**Table S2** Procedures, interventions, and medications during ICU admission.

| <b>Variable</b>                                 | <b>Thiamine<br/>(n = 20)</b> | <b>Placebo<br/>(n = 17)</b> |
|-------------------------------------------------|------------------------------|-----------------------------|
| <b>CAG</b>                                      |                              |                             |
| Number of patients                              | 11 (55)                      | 7 (41.2)                    |
| Found culprit lesions                           | 7 (35)                       | 4 (23.5)                    |
| LAD                                             | 5 (71.4)                     | 1 (25)                      |
| RCA                                             | 2 (28.6)                     | 3 (75)                      |
| Successful PCI                                  | 7 (35)                       | 3 (17.6)                    |
| <b>TTM</b>                                      |                              |                             |
| Number of patients                              | 8 (40)                       | 8 (47.1)                    |
| Time from ROSC to start TTM,<br>median (IQR), h | 3 (2–6.5)                    | 4 (4–6)                     |
| Induction time, median (IQR), h                 | 4 (4–5)                      | 4 (3.8–6)                   |
| Maintenance time, median (IQR),<br>h            | 24 (24–24)                   | 24 (24–24)                  |
| Rewarming time, median (IQR), h                 | 12 (9–13)                    | 12 (9–14)                   |
| <b>IABP</b>                                     | 2 (10)                       | 2 (11.8)                    |
| Dopamine                                        | 5 (25)                       | 6 (35.3)                    |
| Epinephrine                                     | 4 (20)                       | 5 (29.4)                    |
| Norepinephrine                                  | 7 (35)                       | 6 (35.3)                    |

**Notes:** Data are presented as numbers (%) unless otherwise specified.

**Abbreviations:** CAG, coronary angiography; IABP, intra-aortic balloon pump; IQR, interquartile range; LAD, left anterior descending artery; PCI, percutaneous coronary intervention; RCA, right coronary artery; TTM, targeted temperature management
